# Supplementary material for: Mirrored STDP Implements Autoencoder Learning in a Network of Spiking Neurons
Source: PLOS journal article supplement (doi:10.1371/journal.pcbi.1004566), 2015-12-03
Supplement: S2 (10.1371/journal.pcbi.1004566.s002) [file journal.pcbi.1004566.s002]

**S1 Table. Model Summary**

|                             |                                                                                                                                                                                                                                                                                                        |
|-----------------------------|--------------------------------------------------------------------------------------------------------------------------------------------------------------------------------------------------------------------------------------------------------------------------------------------------------|
| <b>Populations</b>          | Four: Visible and Hidden neurons, and one Inhibitory Pool for each layer.                                                                                                                                                                                                                              |
| <b>Connectivity</b>         | Each visible unit connects reciprocally to each hidden unit. No lateral connections. Each visible and hidden unit connects reciprocally to every inhibitory unit in that layer's pool.                                                                                                                 |
| <b>Neuron model</b>         | Leaky integrate-and-fire with synaptic scaling and spike-frequency adaptation.                                                                                                                                                                                                                         |
| <b>Synapse model</b>        | Conductance inputs with instantaneous rise after transmission delay and exponential decay.                                                                                                                                                                                                             |
| <b>Input pre-processing</b> | Mean-value subtraction, whitening (natural image patches only), rectification & concatenation to ON/OFF units                                                                                                                                                                                          |
| <b>Training</b>             | For $N_{\max}$ repetitions:<br>1. Choose input stimulus. 2. Set $t = 0$ and reinitialize all neurons to random membrane potentials. 3. Apply input stimulus until $t = t_{\text{stim}}$ . 4. Turn off stimulus, continue running network until $t = t_{\max}$ . 5. Calculate and apply weight changes. |
| <b>Plasticity</b>           | Weights via mSTDP, synaptic scaling via homeostatic adaptation                                                                                                                                                                                                                                         |
| <b>Measurements</b>         | Learned weights, reconstruction error, hidden unit correlations.                                                                                                                                                                                                                                       |
