# Supplementary material for: Mirrored STDP Implements Autoencoder Learning in a Network of Spiking Neurons
Source: PLOS journal article supplement (doi:10.1371/journal.pcbi.1004566), 2015-12-03
Supplement: S4 (10.1371/journal.pcbi.1004566.s004) [file journal.pcbi.1004566.s004]

**S3 Table. Connectivity**

| <b>Name</b>             | <b>Source</b>           | <b>Target</b>           | <b>Pattern</b>                                                                        |
|-------------------------|-------------------------|-------------------------|---------------------------------------------------------------------------------------|
| Feedforward             | Visible                 | Hidden                  | All-all, weights $\mathbf{W}$ , synaptic scaling factors $\phi$ or $\Phi$ , delay $D$ |
| Feedback                | Hidden                  | Visible                 | All-all, weights $\mathbf{Q}$ , delay $D$                                             |
| To Visible Inhibitory   | Visible                 | Visible inhibitory pool | All-all, weights $\mathbf{W}_{\text{Vis,Inh}}$ , delay $D$                            |
| From Visible Inhibitory | Visible inhibitory pool | Visible                 | All-all, weights $\mathbf{W}_{\text{Inh,Vis}}$ , delay $D$                            |
| To Hidden Inhibitory    | Hidden                  | Hidden inhibitory pool  | All-all, weights $\mathbf{W}_{\text{Hid,Inh}}$ , delay $D$                            |
| From Hidden Inhibitory  | Hidden inhibitory pool  | Hidden                  | All-all, weights $\mathbf{W}_{\text{Inh,Hid}}^T$ , delay $D$                          |
