# Supplementary material for: Mirrored STDP Implements Autoencoder Learning in a Network of Spiking Neurons
Source: PLOS journal article supplement (doi:10.1371/journal.pcbi.1004566), 2015-12-03
Supplement: S6 (10.1371/journal.pcbi.1004566.s006) [file journal.pcbi.1004566.s006]

**S5 Table. Plasticity**

| Type                   | Description                                                                                                                                                                                                                                                                                                                                                                                                                                                                                                                                                                                                                                                                                                        |
|------------------------|--------------------------------------------------------------------------------------------------------------------------------------------------------------------------------------------------------------------------------------------------------------------------------------------------------------------------------------------------------------------------------------------------------------------------------------------------------------------------------------------------------------------------------------------------------------------------------------------------------------------------------------------------------------------------------------------------------------------|
| mSTDP                  | <p><math>\mathbf{W}</math> and <math>\mathbf{Q}</math> initialized separately, uniformly distributed in range <math>(0, W_{\text{init}})</math>. For visible unit <math>i</math>, hidden unit <math>j</math>, feedforward learning rate <math>\eta</math>:</p> $\Delta w_{ij} = \Delta q_{ji} = \eta \sum_{k \in \mathcal{S}_i} \sum_{l \in \mathcal{S}_j} \begin{cases} +e^{- t_l - t_k /\tau_+} & \text{if } t_l > t_k \\ -e^{- t_l - t_k /\tau_-} & \text{if } t_l \leq t_k \end{cases}.$ <p>Weights to-from inhibitory pools <math>\mathbf{W}_{\text{Vis,Inh}}</math> initialized separately from exponential distributions with means <math>W_{\text{Vis,Inh}}</math> etc, and do not undergo plasticity.</p> |
| Homeostatic adaptation | <p>Synaptic scaling factors initialized to <math>\phi_{\text{init}}</math> or <math>\Phi_{\text{init}}</math>. <math>\Delta\phi_j = \Delta\Phi_j = \beta(\rho - A_j)</math><br/> <math>\rho</math> = target activation rate, <math>A_j</math> = average activation, initialized equal to 0 and updated after each presentation via</p> $A_j \leftarrow \begin{cases} e^{1/\tau_{\text{fr}}} A_j + (1 - e^{1/\tau_{\text{fr}}}) & \text{if neuron } j \text{ active during the presentation} \\ e^{1/\tau_{\text{fr}}} A_j & \text{otherwise} \end{cases}.$                                                                                                                                                         |
